# Supplementary material
Source: PubMed Central journal article supplement (PMC5319854)
Supplement: NIHMS847185-supplement-S1.pdf [file NIHMS847185-supplement-S1.pdf]

**Neuron, Volume 91**

**Supplemental Information**

**Transcriptional Networks Controlled by NKX2-1  
in the Development of Forebrain GABAergic Neurons**

**Magnus Sandberg, Pierre Flandin, Shanni Silberberg, Linda Su-Feher, James D. Price, Jia Sheng Hu, Carol Kim, Axel Visel, Alex S. Nord, and John L.R. Rubenstein**

Sandberg *et al.* Figure S1

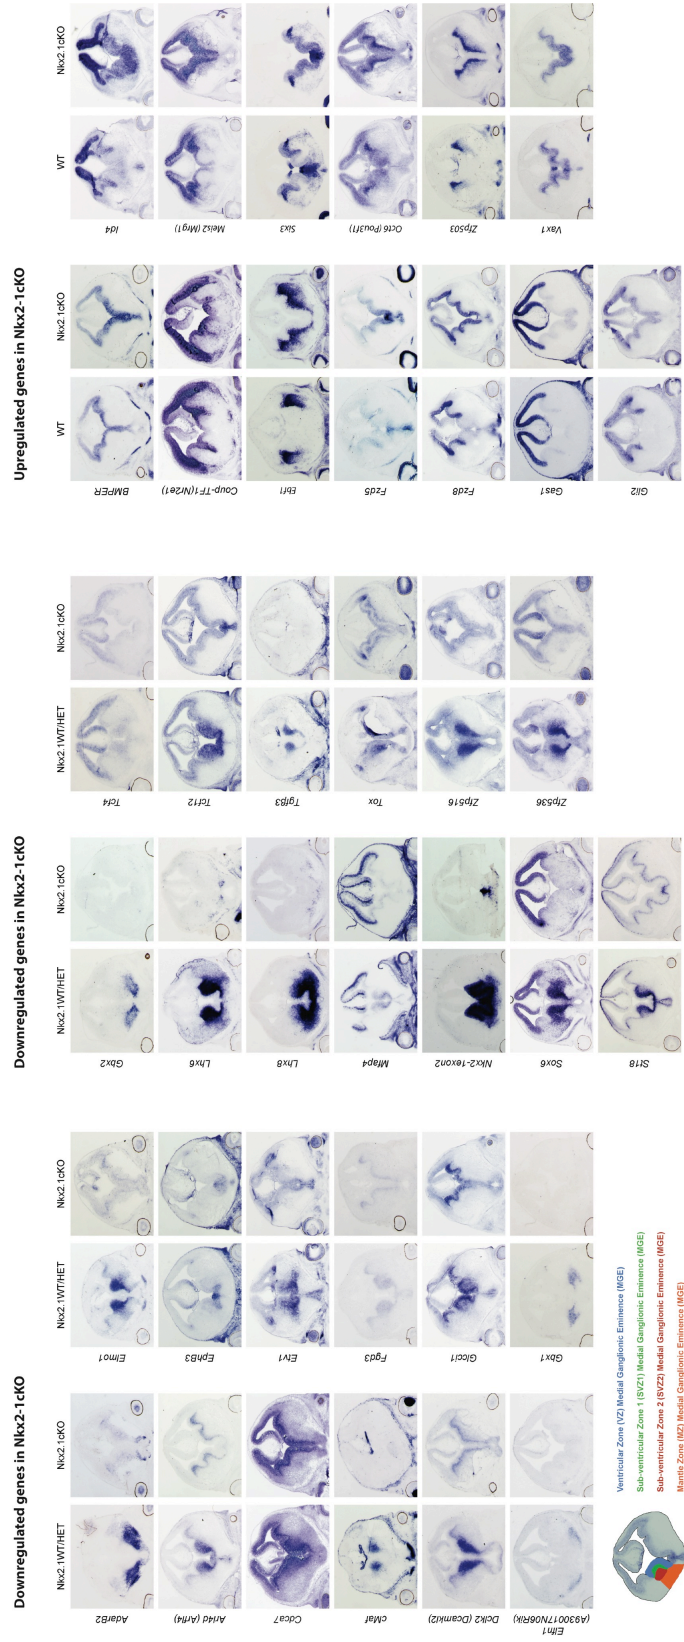

Log2 (Nkx2-1cKO fold change) by chromatin class

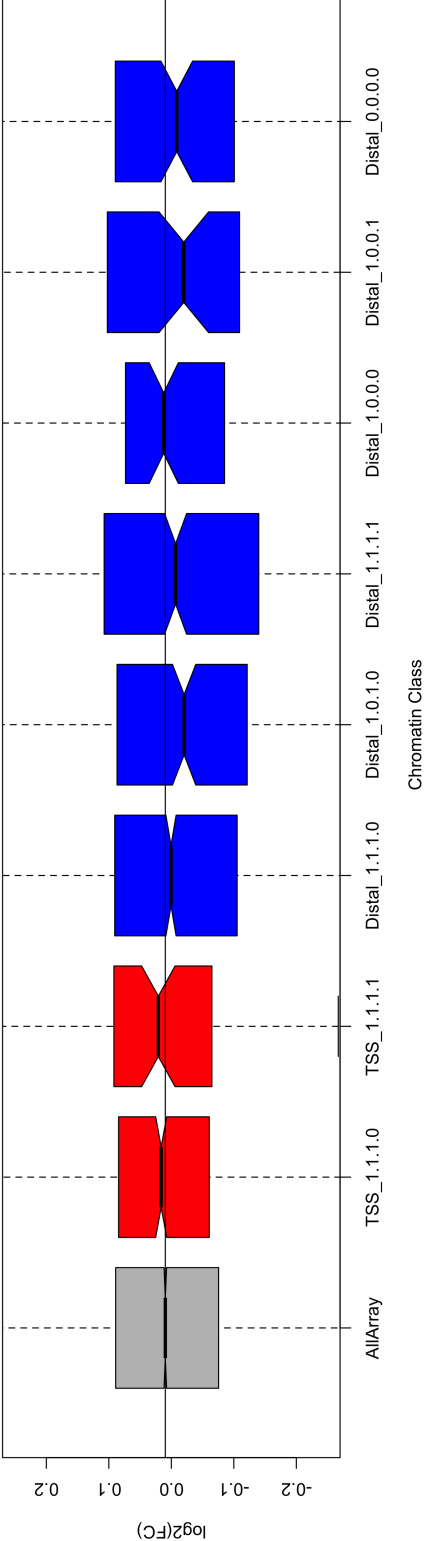

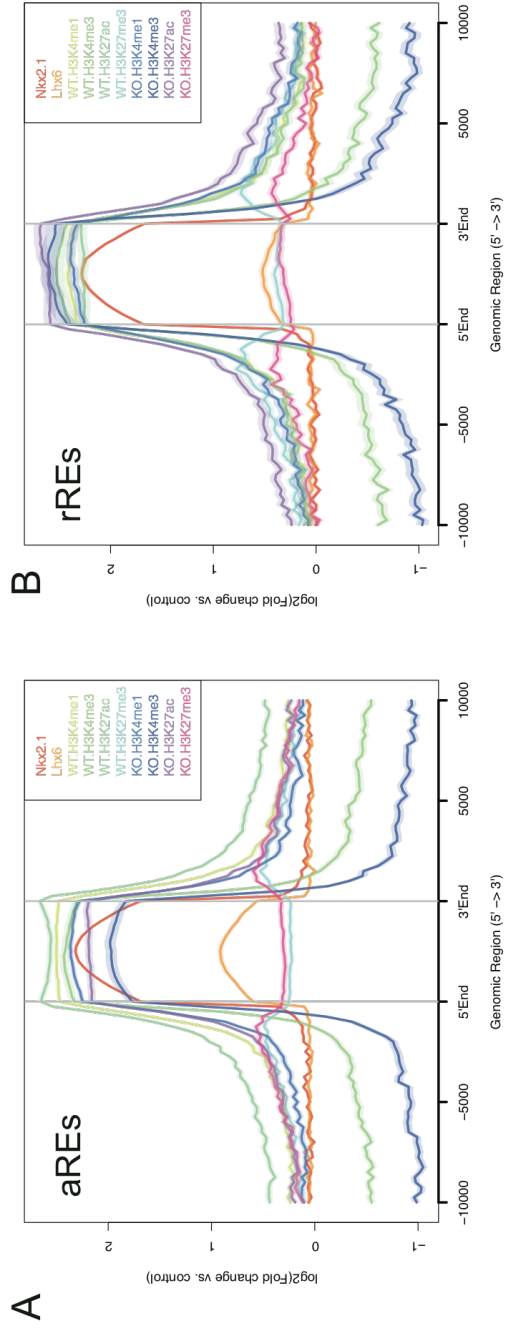

**C. aRES**

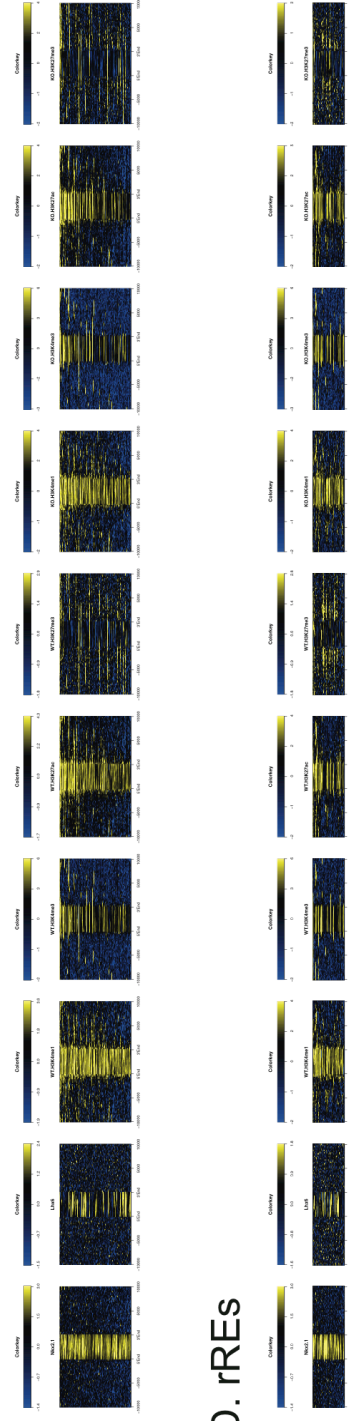

**D. rRES**

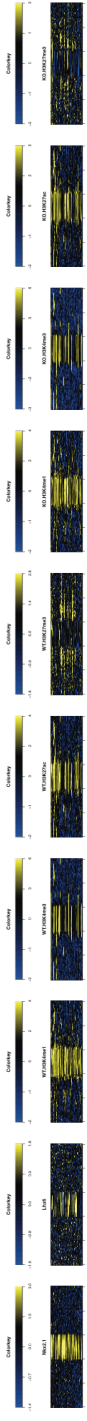

**A** WT and Nkx2-1cKO specific enrichment of histone modifications vs DE in Nkx2-1cKO

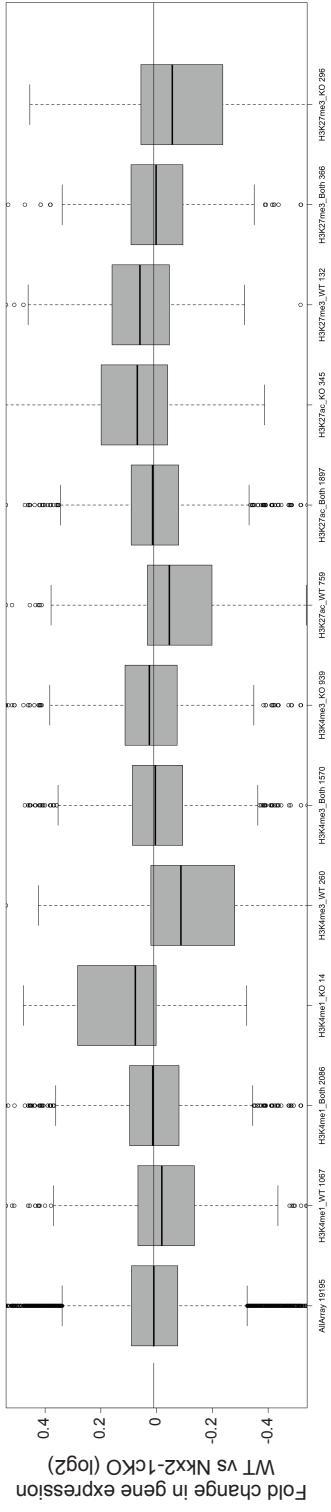

**B**

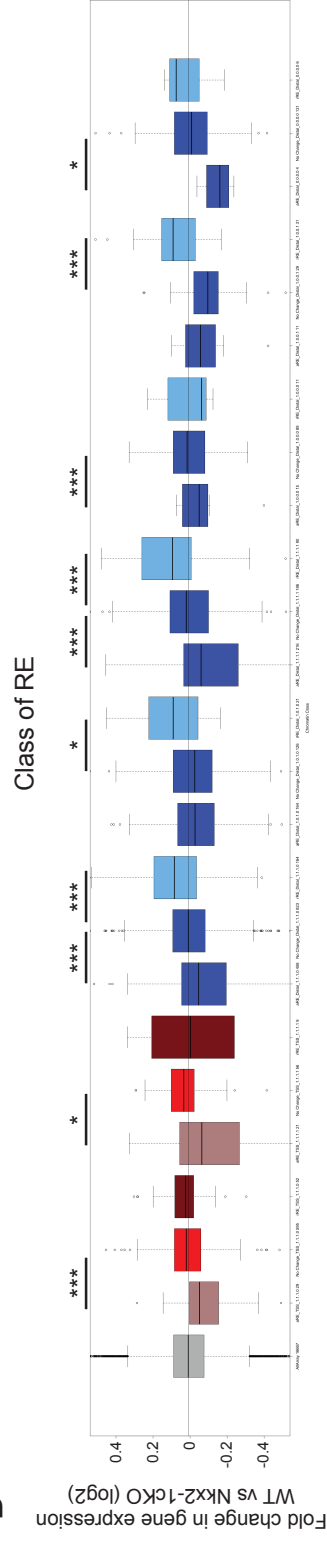

Sandberg *et al.* Figure S5

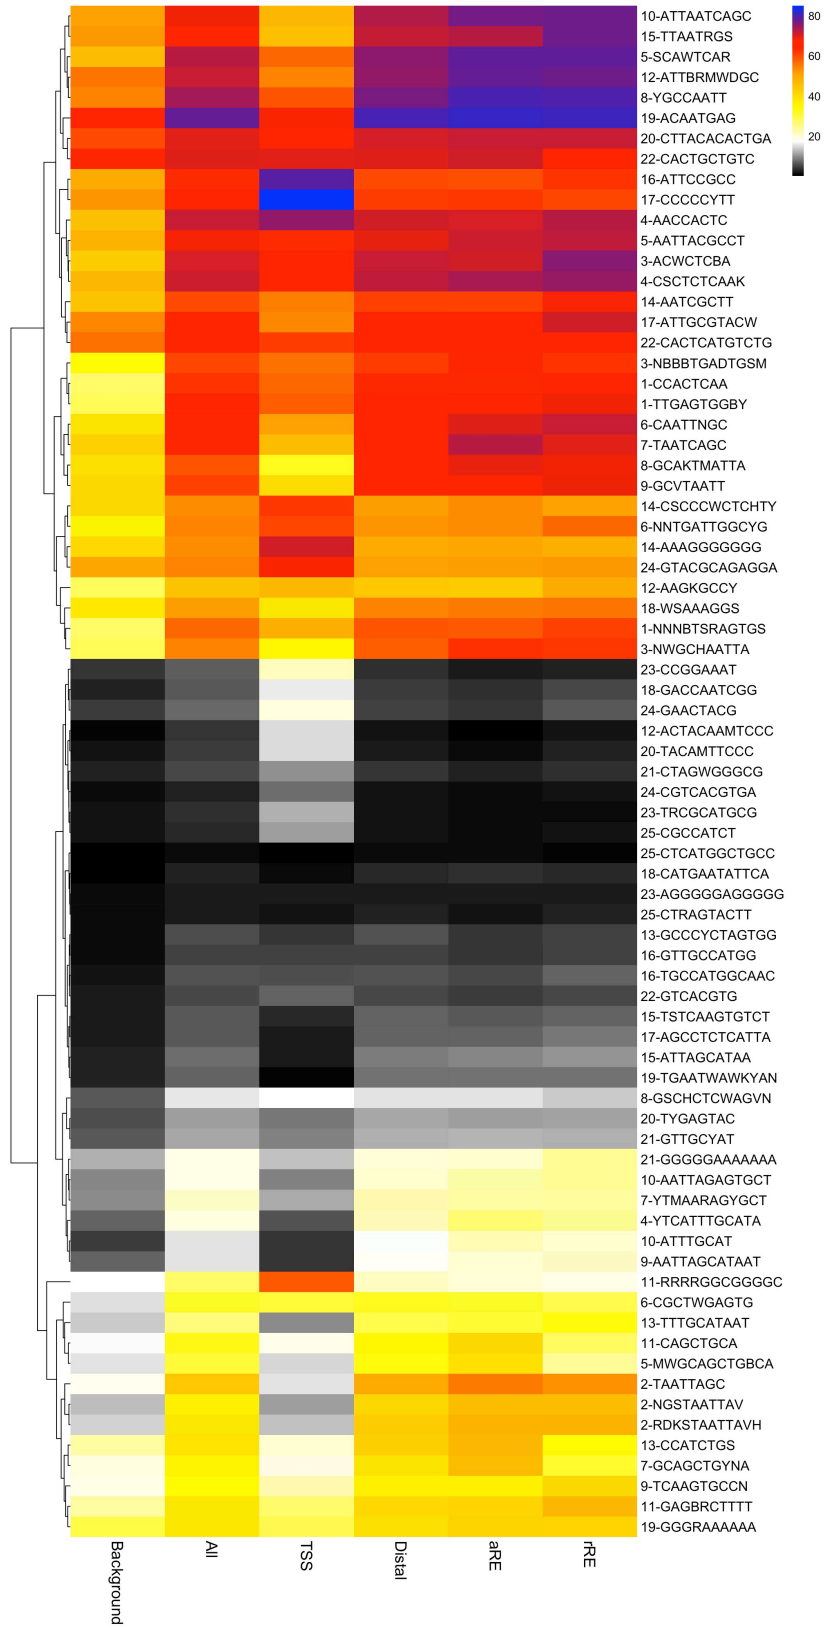

Sandberg *et al.* Figure S6

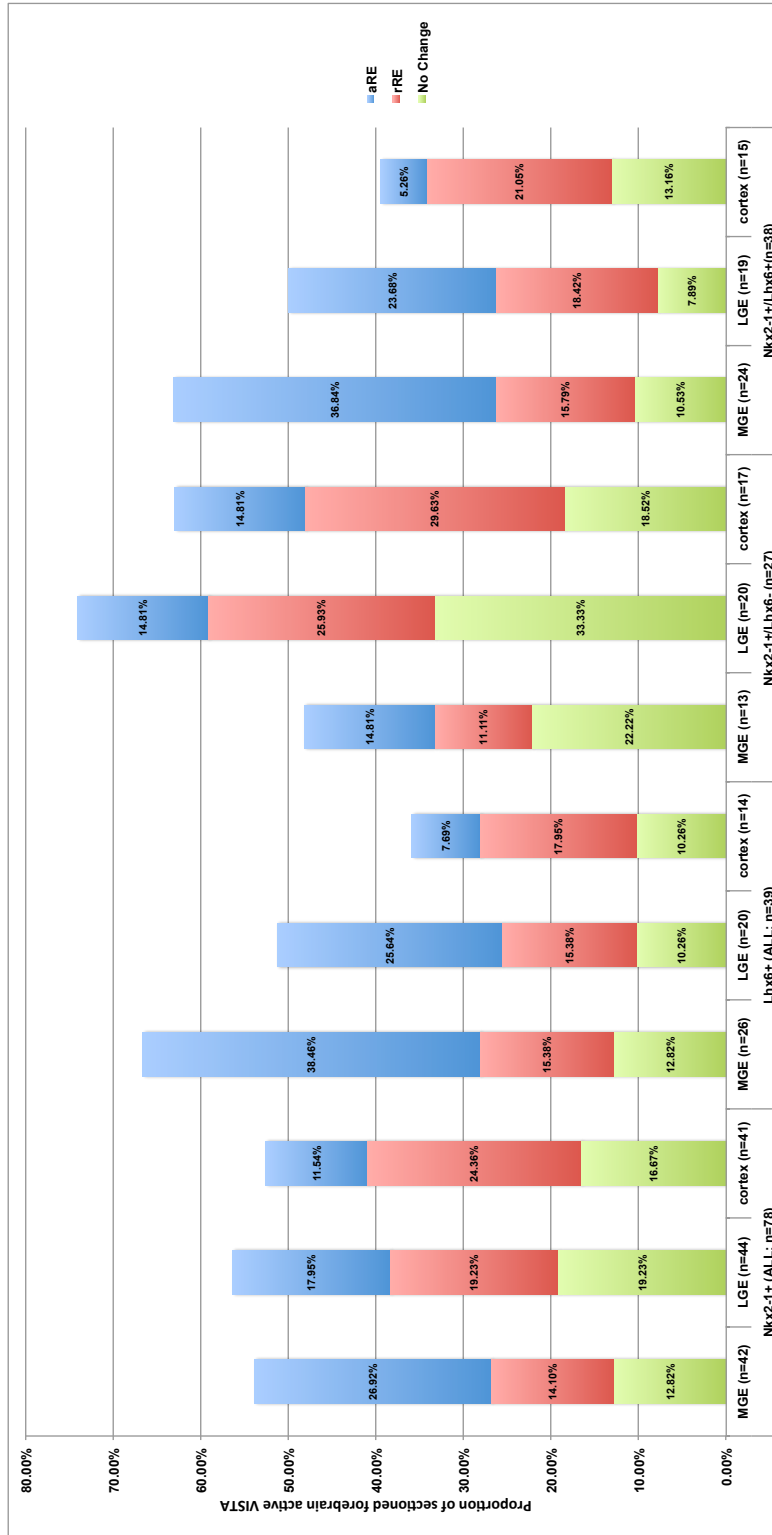

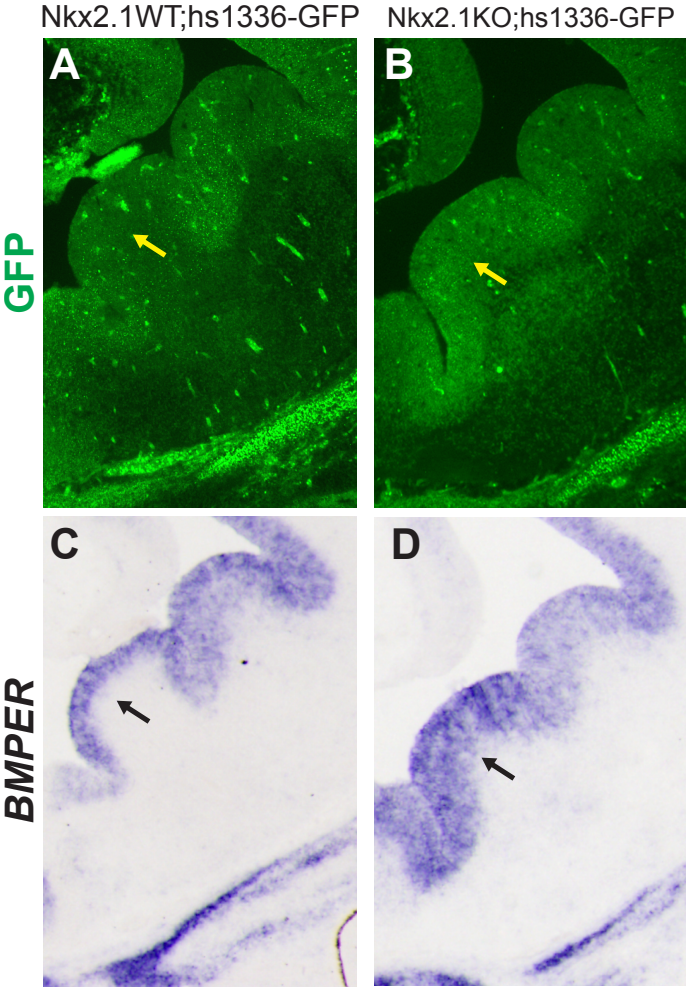

**E** TF specific enrichment versus DE

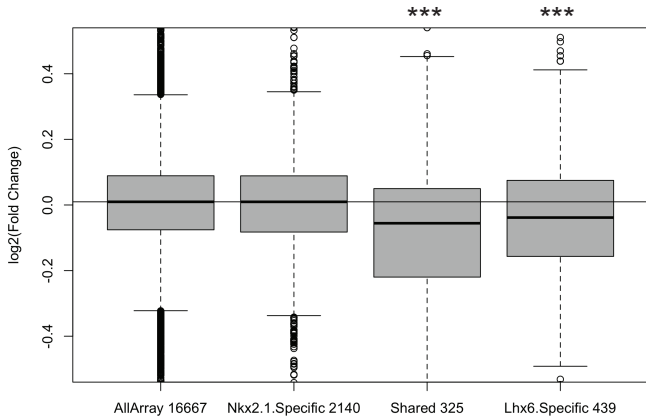



Sandberg *et al.* Figure S8

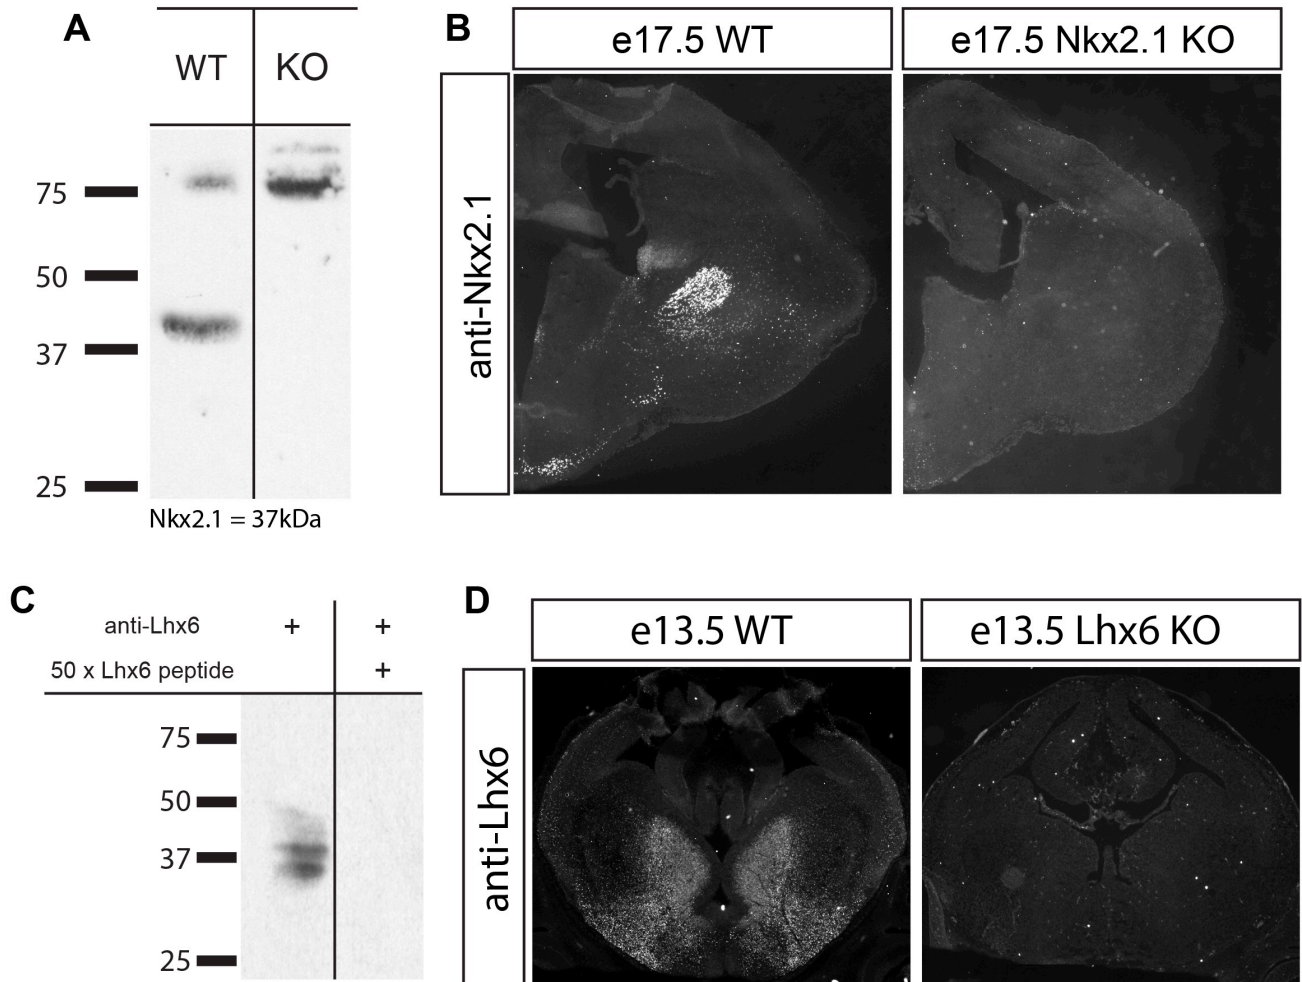

## Supplemental Figure Legends

### Figure S1. *ISH* on differentially expressed genes in the *Nkx2-1*cKO MGE at e13.5. Related to Figures 1, 7 and 8.

Downregulated genes; *AdarB2*, *Arl4d* (*Arfl4*), *Cdca7*, *cMAF*, *Dclk2* (*Dcamkl2*), *Elfn1* (*A930017N06Rik*), *Elmol*, *EphB3*, *Etv1*, *Fgd3*, *Glcci1*, *Gbx1*, *Gbx2*, *Lhx6*, *Lhx8*, *Mfap4*, *Nkx2-1*exon2, *St18*, *Tcf4*, *Tcf12*, *Tgfb3*, *Tox*, *Zfp516* and *Zfp536*. Cutoff,  $-1.25 > \log_2\text{FC}$ . Upregulated genes; *BMPER*, *Ebfl*, *Fzd5*, *Fzd8*, *Gas1*, *Gli2*, *Id4*, *Meis2* (*Mrg1*), *Six3*, *Oct6* (*Pou3f1*), *Zfp503*, *Vax1*. Cutoff,  $\log_2\text{FC} < 1.25$ .

### Figure S2. Average differential gene expression of closes TSS to NKX2-1 bound REs. Related to Figures 3 and 5.

NKX2-1 bound REs divided into 8 groups based on their location and histone profile in the e13.5 WT MGE; 1 - Active TSS (1.1.1.0 = H3K4me1+, H3K4me3+, H3K27ac+ and H3K27me3-), 2 - Bivalent TSS (1.1.1.1), 3 - Active (strong) Distal (1.1.1.0), 4 - Active (weak) distal (1.0.1.0), 5 - Bivalent distal (1.1.1.1), 6 - Latent distal (1.0.0.0), 7 - Repressed distal (1.0.0.1), 8 - No Histone (0.0.0.0). Average log<sub>2</sub> fold differential gene expression (WT vs *Nkx2-1*cKO) for each NKX2-1 RE group. Two sample T-test was used to test significance between the groups: \*\*\*p < 0.001, \*p < 0.05.

### Figure S3. Identification of NKX2-1 bound REs mediating transcriptional activation and repression. Related to Figure 5.

(A-B) Average profile of NKX2-1, LHX6, H3K4me1, H3K4me3, H3K27ac and H3K27me3 at aREs and rREs in WT and *Nkx2-1*cKO MGE at e13.5. (C) Heatmap showing NKX2-1, LHX6, H3K4me1, H3K4me3, H3K27ac and H3K27me3 in WT and *Nkx2-1*cKO MGE (e13.5) at aREs. (D) Heatmap showing NKX2-1, LHX6, H3K4me1, H3K4me3, H3K27ac and H3K27me3 in WT and *Nkx2-1*cKO MGE (e13.5) at rREs.

### Figure S4. Comparison of differential gene expression and changes in histone profiles at NKX2-1 REs. Related to Figure 5.

(A) NKX2-1 bound REs with significant H3K4me1, H3K4me3, H3K27ac and H3K27me3 in WT, *Nkx2-1*cKO or both WT and *Nkx2-1*cKO MGE at e13.5. This plot show the average log<sub>2</sub> fold differential gene expression (WT vs *Nkx2-1*cKO) for each NKX2-1 RE group. (B) NKX2-1 bound REs divided into 24 groups based on their WT histone profile, combined with changes in histone profile in the e13.5 *Nkx2-1*cKO MGE. WT RE groups are defined as follow; Active\_TSS (1.1.1.0 = H3K4me1+, H3K4me3+, H3K27ac+ and H3K27me3-), Bivalent\_TSS (1.1.1.1), Active (strong) distal (1.1.1.0), Active (weak) distal (1.0.1.0), Bivalent distal (1.1.1.1), Repressed distal (1.0.0.1). aREs have reduced H3K4me3 and/or H3K27ac, and/or increased H3K27me3. rREs have increased H3K4me3 and/or H3K27ac, and/or reduced H3K27me3. This plot show the average log<sub>2</sub> fold differential gene expression (WT vs *Nkx2-1*cKO) for each NKX2-1 RE group. Wilcoxon test was used to test significance between aREs and rREs compared to REs with no histone change: \*\*\*p < 0.001, \*p < 0.05.

### Figure S5. *De novo* motif analysis of NKX2-1 bound REs. Related to Figure 5.

Frequency of discovered *de novo* motifs at; background, all REs, TSS, distal REs, aREs and rREs. All motif sequences indicated.

### Figure S6. Proportion of aREs and rREs of NKX2-1 and/or LHX6 bound VISTA. Related to Figure 7.

Proportion of MGE, LGE and cortex positive VISTA elements. The VISTA elements were divided into the following groups based on NKX2-1 and LHX6 binding; NKX2-1 (all REs), LHX6 (all REs), +/-REs and +/+REs. Each group has been scored for the proportions of aREs, rREs and REs with no change in the histone configuration.

### Figure S7. Activity of BMPER enhancer, hs1336, in WT and *Nkx2-1*cKO MGE at e13.5. Related to Figure 8.

Activity of hs1336-GFP in the basal ganglia of control (A) and *Nkx2-1*cKO (B) at e13.5. *In situ* analysis of *BMPER* transcription in WT (C) and *Nkx2-1*cKO (D) forebrain at e13.5. Yellow arrows (A and B) indicate increased hs1336 activity in the mutant SVZ of the MGE. Black arrows (C and D) indicate a consistent increase in *BMPER* expression in the VZ and SVZ1 of the mutant MGE. (E) Average differential gene

expression of closes TSS to +/-REs, +/+REs and -/+REs. Wilcoxon test was used to test differences between control genes (whole array) and the different groups: \*\*\*p < 0.001.

**Figure S8. Validation of polyclonal NKX2-1 and LHX6 antibodies. Related to Figure 2, 6 and Experimental Procedure.**

(A) Western blot analysis on WT and *Nkx2-1*KO MGE tissue (e13.5), using NKX2-1 polyclonal for the blot. (B) NKX2-1 IHC on WT and *Nkx2-1*KO telencephalon (e17.5). (C) Western blot analysis on WT and *Lhx6*KO MGE tissue (e13.5), using LHX6 polyclonal for the blot. (D) LHX6 IHC on WT and *Lhx6*KO telencephalon (e13.5).

**Data S1. Summary of *Nkx2-1*KO RNA expression micro-array and ChIP-seq analysis. Related to Figures 1-3 and Figures 5-8.**

**Supplemental Experimental Procedures**

**Control primers ChIP-qPCR**

*Nkx2-1*\_positive: 5' TCTCTCCCCCTCTCCCTGCAC, 3'GCTTGGATTGCAAAGGAACTAAGCG  
*Lhx6*\_positive: 5'GCCATTAATGAACCTATGACAGCC, 3'AGCAGTGTTCAAGCTCCTCTG  
*H3K4me1*\_positive1: 5'ACGTCCAGAAGCATCTGCATTTCCA,  
3'ACTGTTCAAGGGAAGACTGACCT  
*H3K4me3\_H3K27me3*\_positive: 5' AACTCACTCAAGCACACGGT,  
3'GAGTTGGGCGCCAATCCTAT  
*H3K27Ac*\_positive: 5'GCAGTGGCTCATTCCCTCCCC, 3'GCAGCCTCGCCTTCCTCCAG  
Negative\_control\_1: 5'AGCCAGACCCCTGCAGCCATT, 3'AGTGGCTTGCTTAGGCAGGGGAG  
Negative\_control\_2: 5'TGAAAGTGCCTGGCAGCCCAA, 3' GCTGTCTCTGCATTCCCCCA  
Negative\_control\_3: 5'TGCAGCAGCCTCTCCAGGTG, 3'TGCCAAATGTGCTCAGTACCCTGC

**Primers used to generate in situ probes**

*Adarb2*: 5'TCTCCGAGACAGCCGAGAAG, 3'CTCACGCCACTAAGGAGAGG  
*Arl4d*: 5'CTGCATGTCGTCGTCATTGG, 3'CGTCTCTTCTTGCTCGACCG  
*BMPER*: 5'GGAGGGTGTGGTGACAGAGT, 3'GTCCAGGTCGATGTGGAAGT  
*Cdca7*: 5'ATCGTCTCCTCCGATGACA, 3'AGTAAGCATGGACGTTCCCG  
*Dclk2*: 5'TTGAAGAACGGGACAAAAGG, 3'GACTTCGGAGTGGAAAGCTG  
*Dlgap1*: 5'AGGCTTCCCGGAGTAACAAT, 3'CACTTCAACGGCAGAACTCA  
*Elfn1*: 5'TACAGCGTGGGTACTTGTGG, 3'GTAGTCAGGATCACCAGCGG  
*Elmo1*: 5'AGCCAGTTAGCCCCAAGC, 3' TCCACAGCATGTTTAAGGGA  
*EphB3*: 5'CGCTAACGCTGTGGAGGT, 3'CATGAAGACAAACCCGGC  
*Fgd3*: 5'GAACCTCCCCTGTGAGGAGAG, 3'GGTACACAGTAGAGCATCACAT  
*Fzd5*: 5'CACTCAAGACTCCGGAGAGG, 3'GTAGCGGAATCGTTCATGT  
*Fzd8*: 5'CTGCCACAACCCCTTCTTTA, 3'CGGTGTGCTGCTCATAGAA  
*Gas1*: 5'CACTGCATCTCGGCGCTTA, 3'AAGTGTGACCCGAGCAGC  
*Gli3*: 5'ACGGGACCCCTCATGTTCA, 3'AGTGTGTCAGAGCCGAG  
*Gli2*: 5'GGAGGGAAGGTACCATTATGACC, 3'GAATGGTGATGGGGTTCACGG  
*Id4*: 5'GGCCAGAGCAGAAATTAAGAGA, 3'GAAACTGGATACTGGGCAAAAC  
*Meis2*: 5'TCTGGAGTTAGAAAAGGTCCACG, 3'GTCCATAACCTGTCCGCCAA  
*Mfap4*: 5'TACAAGCTGGGCTTTGGC, 3'GGTGTGGCAGTGTGCAAG  
*Nkx2-1*-exon2: 5'CTGTGCGTTTGTGCTTACA, 3'CTCAAGCGCATCTCACGCTC  
*Oct6*: 5'CCCTCTACGGTAACGTGTTCTC, 3'AGTGTGTGGTGGTGGTGGT  
*St18*: 5'TTGGTAATGTGAGCTGTGAAGG, 3'TGTGTGTGTATGTGCATGTGTG  
*Tcf12*: 5'TCTCGAATGGAAGACCGC, 3'CTCCCTCCTGCCAGGTTT

*Tgfβ3*: 5'GGACTTCGGCCACATCAAGA, 3'CCAGGTTGCGGAAGCAGTAA  
*TOX*: 5'TGCCTGGACCCCTACTATTG, 3'CATTGATGCCACAATCTTCG  
*Vax1*: 5'AGAAGAAGGACCAGGGCAAG, 3'CTCAGGTAACGGGCTGAGAG  
*ZFP503*: 5'CAAGAAAGATCCGGAAGCTG, 3'CCCATTAGCAGACACCCAGT  
*ZFP516*: 5'GCAGGAAGCAAGAACAGACC, 3'CAGCCTCTTACCCTGTCA  
*ZFP536*: 5'GCTCATCAGTCACGTGGAGA, 3'CTGGTGGTAGGTTCCGAAAA

Additional probes were described in Long et al., 2009.

### Generation of mm1429 transgenic

mm1429 was amplified from mouse genomic DNA by polymerase chain reaction (PCR), sequence validated and inserted into pCR-Blunt II-TOPO (Zero Blunt TOPO PCR Cloning Kit, Invitrogen). mm1429 was further sub-cloned into an Hsp68-LacZ reporter vector (5'-XhoI:mm1429:XhoI-3') (Kothary et al., 1989). Generation of transgenic mice and embryo staining was done as previously described (Poulin et al., 2005). Transgenic embryos were sectioned and β-galactosidase was detected using an anti-β-galactosidase antibody (MP Biomedicals, Cat.# 0856028).

### Site directed mutagenesis of mm1429

NKX2-1 and LHX6 motifs were mutated in pCR-Blunt II-TOPO, sequence verified and sub-cloned into a pGL4.23-Luciferase reporter with a minimal β-globin-promoter using SacI and XhoI. The luciferase reporter was generated from pGL4.23-β-globin-promoter-GFP and pGL4.23-Luciferase as templates.

### Primers used to generate mm1429 reporters

mm1429\_WT\_F, CGGAGTCTGCTCCTAGACCCAGATTCCATAC  
mm1429\_WT\_R, CGCTCGAGCCACACACAGGCACAAAAGTAC  
mm1429\_mut\_site#1-F, GCGGCTGGAATTTTTTCATAAGTACCCTTTGGGGGTGG  
mm1429\_mut\_site#1-R, CCACCCCCAAAGGGTACTTATGAAAAAATTCCAGCCGC  
mm1429\_mut\_site#2-F, CCTGGGCTTCAGGAAAGGATTTTTTGGTGTCTCTGGAAATTGCCATC  
mm1429\_mut\_site#2-R, GATGGCAATTTCCAGAGACACCAAAAAATCCTTTCCTGAAGCCCAGG  
mm1429\_mut\_site#3-F, CTTGAAGGCACAAATACTGCCAAAAAACTCTAAGCCGATCCAAATAG  
mm1429\_mut\_site#3-R, CTATTTGGATCGGCTTAGAGTTTTTTTGGCAGTATTTGTGCCTTCAAG  
mm1429\_mut\_site#4-F, CTTTCTTTCAAATTTAAAAAATGTGTACTTTTGTGCC  
mm1429\_mut\_site#4-R, GGCACAAAAGTACACATTTTTTTAAATTTGAAAGAAAG

### Sequence pGL4.23-β-globin-promoter-Luciferase

GGGTTACTAGTACGTCTCTCAAGGATAAGTAAGTAATATTAAGGTACGGGAGGTATTGGACA  
GGCCGCAATAAAATATCTTTATTTTATTACATCTGTGTGTTGGTTTTTGTGTGAATCGATAG  
TACTAACATACGCTCTCCATCAAAACAAAACGAAACAAAACAAACTAGCAAAATAGGCTGTC  
CCCAGTGCAGATGCAAGGTGCCAGAACATTTCTCTGGCCTAACTGGCCGTACCTGAGCTCGCT  
AGCCTCGAGGATATCAAGATCTGGCCTCGGGCCAAAGCTTAGCCCCGGGTGGGCATAAAAG  
TCAGGGCAGAGCCATCTATTGCTTACATTTGCTTCTAGCCTGCAGGTCGAGGAGCGCAGCCTT  
CCAGAAGCAGAGCGCGGCGACCGGTCCACCATGGAAGATGCCAAAAACATTAAGAAGGGCC  
CAGCGCCATTCTACCCACTCGAAGACGGGACCGCCGGCGAGCAGCTGCACAAAGCCATGAAG  
CGCTACGCCCTGGTGGCCGGCACCATCGCCTTTACCGACGCACATATCGAGGTGGACATTACC  
TACGCCGAGTACTTCGAGATGAGCGTTCGGCTGGCAGAAGCTATGAAGCGCTATGGGCTGAA  
TACAAACCATCGGATCGTGGTGTGCAGCGAGAATAGCTTGCAGTTCTTCATGCCCGTGTGGG  
TGCCCTGTTTCATCGGTGTGGCTGTGGCCCCAGCTAACGACATCTACAACGAGCGCGAGCTGCT  
GAACAGCATGGGCATCAGCCAGCCCACCGTCGTATTCGTGAGCAAGAAAGGGCTGCAAAAGA  
TCCTCAACGTGCAAAAGAAGCTACCGATCATAAAAAGATCATCATGATGATAGCAAGACC

GACTACCAGGGCTTCCAAAGCATGTACACCTTCGTGACTTCCCATTTGCCACCCGGCTTCAAC  
GAGTACGACTTCGTGCCCGAGAGCTTCGACCGGGACAAAACCATCGCCCTGATCATGAACAG  
TAGTGGCAGTACCGGATTGCCCAAGGGCGTAGCCCTACCGCACCGCACCGCTTGTGTCCGATT  
CAGTCATGCCCGCGACCCCATCTTCGGCAACCAGATCATCCCCGACACCGCTATCCTCAGCGT  
GGTGCCATTTACCACGGCTTCGGCATGTTACCACGCTGGGCTACTTGATCTGCGGCTTTCGG  
GTCGTGCTCATGTACCGCTTCGAGGAGGAGCTATTCTTGCGCAGCTTGCAAGACTATAAGATT  
CAATCTGCCCTGCTGGTGGCCACACTATTTAGCTTCTTCGCTAAGAGCACTCTCATCGACAAGT  
ACGACCTAAGCAACTTGCACGAGATCGCCAGCGGGGGCGCCGCTCAGCAAGGAGGTAGGT  
GAGGCCGTGGCCAAACGCTTCCACCTACCAGGCATCCGCCAGGGCTACGGCCTGACAGAAAC  
AACCAGCGCCATTCTGATCACCCCCGAAGGGGACGACAAGCCTGGCGCAGTAGGCAAGGTGG  
TGCCCTTCTTCGAGGCTAAGGTGGTGGACTTGGACACCGGTAAGACACTGGGTGTGAACCAGC  
GCGGCGAGCTGTGCGTCCGTGGCCCCATGATCATGAGCGGCTACGTTAACAACCCCGAGGCTA  
CAAACGCTCTCATCGACAAGGACGGCTGGCTGCACAGCGGCGACATCGCTACTGGGACGAG  
GACGAGCACTTCTTCATCGTGGACCGGCTGAAGAGCCTGATCAAATAACAAGGGCTACCAGGT  
AGCCCCAGCCGAACCTGGAGAGCATCCTGCTGCAACACCCCAACATCTTCGACGCCGGGGTCCG  
CCGGCCTGCCCGACGACGATGCCGGCGAGCTGCCCGCCGAGTCGTCGTGCTGGAACACGGT  
AAAACCATGACCGAGAAGGAGATCGTGGACTATGTGGCCAGCCAGGTTACAACCGCCAAGAA  
GCTGCGCGGTGGTGTGTTCGTGGACGAGGTGCCTAAAGGACTGACCCGCAAGTTGGACG  
CCCGCAAGATCCCGAGATTCTCATTAAGGCCAAGAAGGGCGGCAAGATCGCCGTGTAATAA  
TTCTAGAGTCGGGGCGGCCGGCTTCGAGCAGACATGATAAGATAACATGATGATGATTTGGA  
CAAACCACAAGTAGAATGCAGTGAAAAAATGCTTTATTTGTGAAATTTGTGATGCTATTGCT  
TTATTTGTAACCATTATAAGCTGCAATAAACAAGTTAACAACAACAATTGCATTCATTTTATGT  
TTCAGGTTACAGGGGAGGTGTGGGAGGTTTTTTTAAAGCAAGTAAAACCTCTACAAATGTGGTA  
AAATCGATAAGGATCCGTCGACCGATGCCCTTGAGAGCCTTCAACCCAGTCAGTCCCTTCCGG  
TGGGCGCGGGGCATGACTATCGTCGCCCACTTATGACTGTCTTCTTTATCATGCAACTCGTAG  
GACAGGTGCCGGCAGCGCTTTCGGCTTCCTCGCTCACTGACTCGCTGCGCTCGGTCTGTCGGC  
TGCGGCGAGCGGTATCAGCTCACTCAAAGGCGGTAATACGGTTATCCACAGAATCAGGGGAT  
AACGCAGGAAAGAACATGTGAGCAAAAAGGCCAGCAAAAAGGCCAGGAACCGTAAAAAGGCCG  
CGTTGCTGGCGTTTTTCCATAGGCTCCGCCCCCTGACGAGCATCACAAAAATCGACGCTCAA  
GTCAGAGGTGGCGAAACCCGACAGGACTATAAAGATAACCAGGCGTTTCCCCCTGGAAGCTCC  
CTCGTGCCTCTCCTGTTCCGACCCTGCCGCTTACCGGATACCTGTCCGCCTTTCTCCCTTCGG  
GAAGCGTGGCGTTTTCTCATAGCTCACGCTGTAGGTATCTCAGTTCGGTGTAGGTGCTTCGCTC  
CAAGCTGGGCTGTGTGCACGAACCCCGTTCAGCCCGACCGCTGCGCCTTATCCGGTAACCTA  
TCGTCTTGAGTCCAACCCGGTAAGACACGACTTATCGCCACTGGCAGCAGCCACTGGTAACAG  
GATTAGCAGAGCGAGGTATGTAGGCGGTGCTACAGAGTTCCTTGAAGTGGTGGCCTAACTACG  
GCTACACTAGAAGAACAGTATTTGGTATCTGCGCTCTGCTGAAGCCAGTTACCTTCGGAAAAA  
GAGTTGGTAGCTCTTGATCCGGCAAAACAAACCACCGCTGGTAGCGGTGGTTTTTTTTGTTTGCA  
AGCAGCAGATTACGCGCAGAAAAAAGGATCTCAAGAAGATCCTTTGATCTTTTCTACGGGGT  
CTGACGCTCAGTGGAAACGAAAACTACGTTAAGGGATTTTGGTTCATGAGATTATCAAAAAGG  
ATCTTCACCTAGATCCTTTTAAATTAATAAATGAAGTTTTAAATCAATCTAAAGTATATATGAGT  
AACTTGGTCTGACAGCGGCCGCAAAATGCTAAACCACTGCAGTGGTTACCAGTGTGATCAG  
TGAGGCACCGATCTCAGCGATCTGCCTATTTTCGTTTCGTCATAGTGGCCTGACTCCCCGTCGTG  
TAGATCACTACGATTCGTGAGGGCTTACCATCAGGCCCCAGCGCAGCAATGATGCCGCGAGA  
GCCGCTTACCAGCCCCCGATTTGTCAGCAATGAACCAGCCAGCAGGGAGGGCCGAGCGAA  
GAAGTGGTCTGCTACTTTGTCCGCCTCCATCCAGTCTATGAGCTGCTGTGCTGATGCTAGAGT  
AAGAAGTTCGCCAGTGAAGTATTTCCGAAGAGTTGTGGCCATTGCTACTGGCATCGTGGTATC  
ACGCTCGTTCGGTATGGCTTCGTTCAACTCTGGTTCCAGCGGTCAAGCCGGGTCACATG  
ATCACCCATATTATGAAGAAATGCAGTCAGTCCCTTAGGGCCTCCGATCGTTGTCAGAAGTAA  
GTTGGCCGCGGTGTTGTCGCTCATGGTAATGGCAGCACTACACAATTCTCTTACCGTCATGCC  
ATCCGTAAGATGCTTTTTCCGTGACCGGCGAGTACTCAACCAAGTCGTTTTGTGAGTAGTGTAT  
ACGGCGACCAAGCTGCTCTTGCCCGGCGTCTATACGGGACAACACCGCGCCACATAGCAGTA  
CTTTGAAAGTGTCTCATCATCGGGAATCGTTCTTCGGGGCGGAAAGACTCAAGGATCTTGCCG  
TATTGAGATCCAGTTCGATATAGCCCACTTTGCACCCAGTTGATCTTCAGCATCTTTACTTT  
CACCAGCGTTTCGGGGTGTGCAAAAACAGGCAAGCAAAATGCCGCAAGAAGGGAATGAGT  
GCGACACGAAAATGTTGGATGCTCATACTCGTCTTTTTTCAATATTATTGAAGCATTTATCA

## Luciferase reporter assay in primary MGE cultures

MGE tissue was dissected from e13.5 embryos, triturated and plated onto 24-well plates (1 embryo/2wells). Primary cultures were transfected with a total of 500ng DNA using Lipofectamin 2000 (Thermo Fischer) and cultured in Neurobasal Medium (Thermo Fischer) supplemented with 0.5% Glucose, GlutaMAX (Thermo Fischer Scientific) and B27 (Thermo Fischer Scientific). Luciferase assays were performed 48h after transfection using Dual Luciferase Reporter Assay System (Promega). Statistical differences between experimental groups were determined with Chi-square.

## Western blot analysis

MGE tissue from one litter e13.5 and e17.5 MGE was harvested and homogenized in RIPA buffer (150 mM NaCl, 1% NP-40, 0.1% SDS, 0.5% sodium deoxycholate in 50 mM Tris) with protease inhibitor (Complete EDTA-free, Roch) and the total protein was separated in SDS-PAGE gels and transferred to nitrocellulose membranes. Western blotting was performed by standard procedures. Antibodies used: NKX2-1 polyclonal (Santa Cruz, sc-13040) and LHX6 polyclonal antibody (Genscript)

## Differential Expression

Sample preparation, labeling, and array hybridizations were performed according to standard protocols from the UCSF Shared Microarray Core Facilities and Agilent Technologies (<http://www.arrays.ucsf.edu> and <http://www.agilent.com>). Total RNA quality was assessed using a Pico Chip on an Agilent 2100 Bioanalyzer (Agilent Technologies, Palo Alto, CA). RNA was amplified and labeled with Cy3-CTP using the Agilent low RNA input fluorescent linear amplification kits following the manufacturers protocol (Agilent). Labeled cRNA was assessed using the Nanodrop ND-100 (Nanodrop Technologies, Inc., Wilmington DE), and equal amounts of Cy3 labeled target were hybridized to Agilent whole mouse genome 4x44K Ink-jet arrays (Agilent). Hybridizations were performed for 14 hrs, according to the manufacturers protocol (Agilent). Arrays were scanned using the Agilent microarray scanner (Agilent) and raw signal intensities were extracted with Feature Extraction v9.1 software (Agilent). Datasets were normalized using the *quantile* normalization method as earlier described (Bolstad et al., 2003). Hybridization performance was assessed by *Agilent's Feature Extraction 10.1*. For each array, a diagnostic pdf summarizing several diagnostic plots and some summary statistics was produced, and all arrays passed QC analysis. No background subtraction was performed, and the median feature pixel intensity was used as the raw signal before normalization. For NKX2-1, four replicates of e13.5 *Nkx2-1*cKO or WT MGE were used. After normalization, Log<sub>2</sub> fold change was calculated from the average values across replicates where available. The probe with the highest intensity value was selected for each gene. Fold changes of 1.2 or greater were used to define differentially expressed genes for gene set analysis. Fold changes of 1.22 or greater were used in genomic binding analysis. Heatmaps show log<sub>2</sub> fold change and normalized intensity, with genes clustered based on Gaussian expression distributions as estimated using Mclust (<http://www.stat.washington.edu/mclust/>). Gene set enrichment performed using DAVID (Huang et al., 2009) with all mouse genes as background, terms shown selected based on Benjamini-Hochberg corrected significance  $P < 0.05$  and non-redundancy.

## ChIP-seq Computational Analysis

For ChIP-seq datasets, clustering, base calling and quality metrics were performed using standard Illumina software. FASTQ files for ChIP, Negative control, and Input libraries were analyzed for overall quality and then reads were filtered for adaptor sequence and by quality and sequence reads were mapped to the mouse genome (mm9) using BWA (Li and Durbin, 2009), with the run command:

```
bwa aln -t 5 -l 25 mm9 lib.fastq
```

Peak calling on aligned bam files was performed using Macs2 using settings with model building omitted (Feng et al., 2011). Comparison of peak calling with model versus without suggested that the no model settings performed better for our datasets, including for NKX2-1 and LHX6. All peak calling was performed using both Negative binding control and input DNA control. All datasets included in this work showed no enrichment in the Negative binding control or in the Input DNA control. For peaks analyzed further, we used the ChIP versus Input control analysis. Example Macs2 commands:

#### Peak Calling

```
macs2 callpeak -t Nkx2.1.merged.ChIP.bam -c Nkx2.1.merged.Input.bam -f BAM -g mm -n
Nkx2.1_ChIPvsInput_p0.00001 --outdir Nkx2.1_ChIPvsInput_p0.00001 -p 0.00001 --nolambda --
nomodel --extsize=250 --call-summits -bdg
```

#### Differential enrichment

##### *NKX2-1 vs. LHX6*

```
macs2 bdgdiff --t1 Nkx2.1_ChIPvsInput_p0.00001_treat_pileup.bdg --c1
Nkx2.1_ChIPvsInput_p0.00001_control_lambda.bdg --t2
Lhx6_ChIPvsInput_p0.00001_treat_pileup.bdg --c2
Lhx6_ChIPvsInput_p0.00001_control_lambda.bdg --d1 89956032 --d2 50979153 -l 150 --outdir
Nkx2.1_vs_Lhx6_differential --o-prefix Nkx2.1_vs_Lhx6_differential
```

##### *WT vs cKO Histone*

```
macs2 bdgdiff --t1 H3K27ac_WT_ChIPvsInput_p0.00001_treat_pileup.bdg --c1
H3K27ac_WT_ChIPvsInput_p0.00001_control_lambda.bdg --t2
H3K27ac_KO_ChIPvsInput_p0.00001_treat_pileup.bdg --c2
H3K27ac_KO_ChIPvsInput_p0.00001_control_lambda.bdg --d1 59772579 --d2 60128750 -l 150 --
outdir H3K27ac_differential --o-prefix H3K27ac_differential
```

Genome wide coverage generated from aligned bam files using custom scripts, with reads extended to 300bp and coverage estimates were generated in 25bp windows across the genome. Coverage and heatmap diagrams were produced using the ngs.plot.r package (Shen et al., 2014), with coverage normalized against input and for overall library size. Peaks where a significant proportion of reads originated in repetitive sequence were omitted from further analysis. For NKX2-1 and LHX6, merged peak sets were generated across the three replicates. Peaks were annotated to genomic features, including RefSeq and UCSC gene builds and evolutionarily conserved elements (Phastcons, GERP), as well as to nearest gene represented in the *Nkx2-1cKO* microarray dataset. We filtered out peaks that overlapped with alignment gaps, highly repetitive regions, and ENCODE blacklist peaks. For binding to expression analysis, microarray expression estimates were used for all TSS peaks that were also present in the microarray, as well as for peaks with a represented microarray gene within 100kb. Functional enrichment was performed using GREAT with genomic background and default settings. Images of genomic coverage and peaks calls were generated via uploading our datasets to the UCSC genome browser and using UCSC internal tools for image capture and data extraction (Dreszer et al., 2012). For plotting, ChIP-seq replicates bam files were merged to produce combined coverage values. Motif analysis performed using the HOMER package (<http://homer.salk.edu/homer/>) (Heinz et al., 2010), with default settings and genomic background.

#### Example HOMER command:

```
findMotifsGenome.pl Nkx2.1.all.bed mm9 Nkx2.1.All -size -250,250 -mask
```

De novo motifs discovered using the full NKX2-1 and LHX6 ChIP-seq peak sets were then used as the motif set for analysis of peak subsets to identify motifs enriched at certain features (e.g. TSSs) or in specific peak sets (e.g. peaks that show chromatin change in the *Nkx2-1cKO*). De novo motifs were annotated against the internal HOMER database to identify potential transcription factors. All peaks were annotated with motif occurrences using HOMER.

Classification of chromatin state for NKX2-1 and LHX6 peaks performed based on presence of overlapping or flanking histone modification peak (H3K4me1, H3K4me3, H3K27ac, H3K27me3) in datasets from wild-type stage and region matched MGE. Histone ChIP-seq datasets processed as described above. A flanking/overlapping peak was classified as present if merged replicate analysis of histone ChIP-seq datasets had a peak called that reached a significance level of  $P < 0.00001$  in the Macs2 analysis. To

identify NKX2-1-bound REs where chromatin state was sensitive to change in the *Nkx2-1cKO*, we performed ChIP-seq on cKO e13.5 MGE, processing the datasets as described above. After screening to ensure no bias in Negative control or Input datasets, we compared differential ChIP enrichment by running the WT versus the cKO using Macs2 as described above with a cutoff of  $P < 0.00001$ . We performed both WT vs. cKO and cKO vs. WT for each histone mark. Custom R scripts were used for computational analysis and are available at request.

## Supplemental References

- Bolstad, B.M., Irizarry, R.A., Astrand, M., Speed, T.P., 2003. A comparison of normalization methods for high density oligonucleotide array data based on variance and bias. *Bioinformatics* 19, 185–193.
- Dreszer, T.R., Karolchik, D., Zweig, A.S., Hinrichs, A.S., Raney, B.J., Kuhn, R.M., Meyer, L.R., Wong, M., Sloan, C.A., Rosenbloom, K.R., Roe, G., Rhead, B., Pohl, A., Malladi, V.S., Li, C.H., Learned, K., Kirkup, V., Hsu, F., Harte, R.A., Guruvadoo, L., Goldman, M., Giardine, B.M., Fujita, P.A., Diekhans, M., Cline, M.S., Clawson, H., Barber, G.P., Haussler, D., James Kent, W., 2012. The UCSC Genome Browser database: extensions and updates 2011. *Nucleic Acids Res.* 40, D918–23. doi:10.1093/nar/gkr1055
- Feng, J., Liu, T., Zhang, Y., 2011. Using MACS to identify peaks from ChIP-Seq data. *Curr Protoc Bioinformatics* Chapter 2, Unit 2.14–2.14.14. doi:10.1002/0471250953.bi0214s34
- Heinz, S., Benner, C., Spann, N., Bertolino, E., Lin, Y.C., Laslo, P., Cheng, J.X., Murre, C., Singh, H., Glass, C.K., 2010. Simple combinations of lineage-determining transcription factors prime cis-regulatory elements required for macrophage and B cell identities. *Molecular Cell* 38, 576–589. doi:10.1016/j.molcel.2010.05.004
- Huang, D.W., Sherman, B.T., Lempicki, R.A., 2009. Systematic and integrative analysis of large gene lists using DAVID bioinformatics resources. *Nat Protoc* 4, 44–57. doi:10.1038/nprot.2008.211
- Kothary, R., Clapoff, S., Darling, S., Perry, M.D., Moran, L.A., Rossant, J., 1989. Inducible expression of an hsp68-lacZ hybrid gene in transgenic mice. *Development* 105, 707–714.
- Li, H., Durbin, R., 2009. Fast and accurate short read alignment with Burrows-Wheeler transform. *Bioinformatics* 25, 1754–1760. doi:10.1093/bioinformatics/btp324
- Poulin, F., Nobrega, M.A., Plajzer-Frick, I., Holt, A., Afzal, V., Rubin, E.M., Pennacchio, L.A., 2005. In vivo characterization of a vertebrate ultraconserved enhancer. *Genomics* 85, 774–781. doi:10.1016/j.ygeno.2005.03.003
- Shen, L., Shao, N., Liu, X., Nestler, E., 2014. ngs.plot: Quick mining and visualization of next-generation sequencing data by integrating genomic databases. *BMC Genomics* 15, 284. doi:10.1186/1471-2164-15-284
